# 1 **Engineering Threshold-Based Selection Systems**

2

3

4

5 Katherine H. Pedone<sup>1</sup>, Vanessa González-Pérez<sup>2</sup>, Luciana E. Leopold<sup>2,3</sup>, Channing J.

6 Der<sup>1,2,4</sup>, Adrienne D. Cox<sup>1,2,4,5</sup>, Shawn Ahmed<sup>2,3</sup> and David J. Reiner<sup>1,4,6\*</sup>

7

8 <sup>1</sup>Lineberger Comprehensive Cancer Center, <sup>2</sup>Curriculum in Genetics and Molecular

9 Biology, and the Departments of <sup>3</sup>Biology, <sup>4</sup>Pharmacology and <sup>5</sup>Radiation Oncology,

10 University of North Carolina, Chapel Hill, NC 27599, USA, <sup>6</sup>Institute of Biosciences and

11 Technology, College of Medicine, Texas A&M Health Science Center, Houston, TX

12 77030, USA.

13

14

15

16

17

18

19 \* Correspondence should be addressed to: [dreiner@tamu.edu](mailto:dreiner@tamu.edu)

20

21 key words: EGL-1, BH3-only, SMG-1, nonsense-mediated decay, NMD, 3'UTR, small

22 GTPase

23

24 **Abstract**

25 Using model organisms to identify novel therapeutic targets is frequently constrained by  
26 pre-existing genetic toolkits. To expedite positive selection for identification of novel  
27 downstream effectors, we engineered conditional expression of activated CED-10/Rac to  
28 disrupt *C. elegans* embryonic morphogenesis, titrated to 100% lethality. The strategy of  
29 engineering thresholds for positive selection using experimental animals was validated  
30 with pharmacological and genetic suppression and is generalizable to diverse molecular  
31 processes and experimental systems.

32

33        Harnessing model invertebrates to screen for small molecule inhibitors or for new  
34 genetic components of known processes is desirable because of the phylogenetic  
35 conservation of many key metazoan proteins and the infrequency of gene redundancy  
36 compared to mammals. Direct, unbiased screening for phenotypes is potentially powerful.  
37 Yet direct screening, whether with libraries of small molecules, RNAi, or chemical  
38 mutagenesis, can be difficult due to extensive phenotypic buffering and non-homolog  
39 redundancy in many biological processes. Additionally, potential screens depend on the  
40 availability of optimally suited reagents and/or phenotypes. These tools are frequently  
41 unavailable.

42        Screens can also demand sensitivity. For example, small molecule inhibitors must  
43 confer robust phenotypes, which may thus exclude potentially valuable lead compounds  
44 that would confer modest effects in initial screens. Screens can also be very laborious,  
45 particularly when scaled up to throughput levels necessary to detect rare positive  
46 candidates that confer incompletely penetrant or expressive phenotypes. Engineering of  
47 sensitized platforms that allow for identification of even atypical or rare candidates will  
48 help revolutionize approaches to contemporary experimental biology.

49        We have devised a method for engineering sensitized screening platforms using the  
50 experimental model organism *C. elegans*. This scheme is theoretically generalizable to  
51 any experimental organism. Our inspiration came from the activating mutation *let-*  
52 *60(n1046gf)* in the *C. elegans* ortholog of the human RAS oncoprotein. This G13E gain-  
53 of-function mutation induces ectopic 1° vulval cells and hence a 100% penetrant  
54 Multivulva phenotype that is exquisitely sensitive to perturbation of downstream genes<sup>1,2</sup>,  
55 including genes that, when mutated alone, do not cause strong phenotypes, due to

56 modulatory roles or redundancy<sup>3-6</sup>. Consequently, we aimed to develop a system where  
57 reagents similar to *let-60(n1046gf)* could be engineered on demand, and then exploited  
58 for genetic and pharmacological discovery screens.

59 We started with a signal known from mammalian studies and well conserved in *C.*  
60 *elegans*, but where the optimal genetic tools have not been previously generated by the  
61 research community. We used a conditional expression system whose full activation  
62 confers 100% toxicity. As needed, lethality could theoretically be conferred either at the  
63 level of failure of essential multicellular processes or the viability of single cells. This  
64 lethality thus establishes a threshold for positive selection for identifying suppressing  
65 compounds or mutations in the process of interest ( **Fig. 1a**).

66 *C. elegans* Rac<sup>CED-10</sup> is identical to human Rac in the critical Switch I and II regions  
67 involved in effector and regulator interactions ( **Fig. 1b**). We focused specifically on  
68 essential morphogenetic functions of CED-10 that occur in differentiated cells that are  
69 post-mitotic, thus avoiding potentially complicated analyses of multiple biological  
70 processes in parallel<sup>7</sup>.

71 We expressed cDNAs behind the *eFGHi* variant of the *lin-26* promoter, which drives  
72 expression specifically in embryonic epithelial cells ( **Fig. 1c**; **Fig. S1**)<sup>8</sup>. To achieve  
73 conditional expression, we used a synthetic 3'UTR that is subject to aggressive nonsense  
74 mediated mRNA decay (NMD), thus degrading the ectopically expressed mRNA.  
75 Transgenes were then expressed in a temperature-sensitive (ts) mutant for *smg-1*, an  
76 essential component of the NMD process.

77 We initially became interested in NMD by identification of a mutation in the gene *unc-*  
78 *97* that was suppressible by disruption of NMD via null (*re1* and *re861*) or temperature-

79 sensitive (*cc545* and *cc546*) mutations in SMG-1, a conserved protein with a domain  
80 similar to that of PI3 Kinase. We confirmed the temperature-sensitivity of *smg-1* alleles  
81 *cc545* or *cc546* alleles using behavioral and semi-quantitative RT-PCR experiments for  
82 *unc-54(r293)*, which harbors a mutation in the 3'UTR of the endogenous *unc-54* gene that  
83 confers NMD-dependent loss of function and defective locomotion (**Figs. S2-5**). We found  
84 that *cc545* and *cc546* are predicted to cause single amino acid changes (**Fig. S6**),  
85 consistent with the hypothesis that temperature-sensitive mutations perturb protein  
86 structure or stability of SMG-1 in a manner that could allow for temperature-sensitive  
87 regulation of NMD.

88 We engineered expression of green fluorescent protein (GFP) cDNA under control of  
89 a synthetic NMD-sensitive (NMD<sup>S</sup>) 3' UTR, all in the *smg-1(cc546ts)* genetic background.  
90 At restrictive temperature, where NMD is inactivated and hence mRNA stabilized and  
91 protein expressed, we observed high levels of GFP in embryonic epithelia. At permissive  
92 temperature, where NMD is functional, we observed lower levels of GFP, revealing some  
93 leakiness in NMD-dependent degradation of experimental mRNA (**Fig. 1d-g; Fig. S1**).  
94 Conditionally expressed GFP did not induce embryonic lethality, though weak  
95 morphological dysgenesis was observed (**Table S1; Fig. S7**). Thus, expression was  
96 temperature-sensitive, restricted to embryonic epithelial cells, and non-toxic.

97 To test our hypothesis that titratable expression of toxic proteins could be regulated  
98 with the NMD<sup>S</sup> 3'UTR, we generated transgenic animals expressing Q61L mutant  
99 (constitutively active) CA-Rac<sup>CEP-10</sup>. We observed that CA-Rac<sup>CEP-10</sup>-dependent  
100 embryonic lethality was exquisitely titratable based on 1-degree steps of temperature. At  
101 restrictive temperatures we observed catastrophic failure of embryonic morphogenesis

102 and elongation, with 100% embryonic lethality at 22°C. We decided to focus on 23°C as  
103 a fully penetrant non-permissive temperature for future experiments (**Fig. 1h-j**). Thus, our  
104 system is capable of generating conditional lethality calibrated to 100% lethality.

105 To further validate our expression system using a different signaling modality, we  
106 expressed the pro-apoptotic BH3-only protein, EGL-1<sup>10</sup>. At restrictive temperature, this  
107 transgene induced ~100% lethality, was weakly suppressed by CED-3/caspase-directed  
108 RNAi, and strongly suppressed by the mutation *ced-3(n717)* in the *C. elegans* caspase  
109 (**Table S2**). At permissive temperature, little or no effect of this transgene was observed,  
110 thereby corroborating the threshold-based selection paradigm we sought. This  
111 temperature-sensitive NMD-sensitive system has also been harnessed for conditional  
112 expression of toxic signaling proteins for purposes of interrogating biological  
113 functions<sup>11,12</sup>.

114 We validated our screening methodology with mutations in Rac effectors and a  
115 selective small molecule inhibitor of mammalian Rac. The Pak serine/threonine kinase is  
116 a classic Rac effector that controls cytoskeletal dynamics and contributes to  
117 morphogenetic events downstream of Rac<sup>CED-10</sup> in *C. elegans*<sup>13,14</sup>. Mutation of Pak<sup>MAX-2</sup>  
118 partially suppressed CA-Rac<sup>CED-10</sup>-dependent lethality (**Fig. 2a**). Mutation of other known  
119 effectors was mostly inconsequential. Our genetic data indicate that CA-Rac<sup>CED-10</sup> signals  
120 through at least one known effector.

121 We and others showed previously that the small molecule EHT 1864 blocked Rac  
122 effector signaling and induction of membrane ruffling in mammalian cells<sup>15,16</sup>. As  
123 overexpression of activated small GTPases like Rac could have unintended effects on  
124 cell biology, we asked if a selective inhibitor of Rac could suppress the effects of CA-

125 Rac<sup>CE<sup>D</sup>-10</sup>-dependent lethality. Treatment with EHT 1864 completely reversed the lethality  
126 conferred by CA-Rac<sup>CE<sup>D</sup>-10</sup> (**Fig. 2b-f; Fig. S8**). Most rescued animals appeared normal.  
127 Wild-type animals exposed to the same dose-response curve did not exhibit increased  
128 lethality. The structurally related negative control molecule EHT 8560 failed to rescue.  
129 These results affirm that it is CA-Rac<sup>CE<sup>D</sup>-10</sup> that conferred specific embryonic lethality and  
130 that compounds capable of inhibiting mammalian Rac can function to suppress Rac<sup>CE<sup>D</sup>-  
131 10</sup> activity in a distinct metazoan.

132 In summary, we have shown that it is possible to engineer specific biochemical  
133 pathways to establish the key threshold of 100% lethality. Such engineering can thereby  
134 selectively sensitize these pathways to both genetic and/or chemical suppression, via  
135 principles derived from classical suppressor genetics. We expect that the CRISPR  
136 revolution will further expand the flexibility, power and sensitivity of such engineered  
137 thresholds. We speculate that, if the appropriately sensitive tissue can be defined, this  
138 approach is generalizable to any experimental organism or biological process, including  
139 to humanized targets where this is advantageous. Conventional targeted therapies are  
140 based on the assumption that researchers have identified the best pharmacological  
141 target. A strength of our approach is that genetically sensitizing pathways in a model  
142 organism employs a different set of assumptions, and so lets the biology tell us which  
143 targets are most important for function. Thus, our study provides a paradigm for directed  
144 selection efforts targeting diverse pathways and various experimental genetic organisms  
145 in a manner that is broadly applicable in experimental biology.

146

147 **Acknowledgements**

148 We thank M. Labouesse for pML433 and A. Fire for temperature-sensitive *smg-1* strains  
149 and plasmid pPD118.44, containing the synthetic NMD-sensitive (NMD<sup>S</sup>) 3'UTR, derived  
150 from the inverted *let-858* coding sequences. We thank Virginie Picard (ExonHit  
151 Therapeutics) for EHT 1864 and EHT 8560. This work was supported by NIH grant  
152 R01GM121625 to D.J.R. and R01CA175747 to C.J.D. K.H.P. was supported by NIH  
153 grant T32CA009156. Some strains were provided by the CGC, which is funded by NIH  
154 Office of Research Infrastructure Programs (P40 OD010440). Wormbase was used  
155 regularly.

156

## 157 **Figure legends**

158 **Figure 1. A system for conditional expression of signaling proteins to titrate to**  
159 **100% functional threshold. a)** A hypothetical graph of temperature-controlled levels of  
160 gene product required to reach the threshold of 100% lethality. **b)** 100% residue identity  
161 among Rac GTPases of *C. elegans*, *Drosophila melanogaster*, and humans in the  
162 structurally critical Switch I and II regions that harbor the core effector binding sequence  
163 (boxed). **c)** A schematic of plasmids for conditional expression of proteins, either control  
164 GFP, constitutively activated CED-10/Rac, or pro-apoptotic BH3-only protein EGL-1. The  
165 promoter is the “eFGHi” variant of the *lin-26* promoter, which drives expression in  
166 hypodermis (epithelial) cells in the embryo; the NMD-sensitive 3'UTR is inverted coding  
167 sequences from the *let-858* gene (A. Fire, pers. comm.). **d-g)** Temperature control of  
168 epithelial-specific expression from integrated transgene *rels8* of GFP in epithelial cells  
169 under control of the hypodermal promoter and NMD-sensitive 3'UTR, in a *smg-1(cc546ts)*  
170 mutant background for temperature-sensitive perturbation of NMD. **d, e)** 100x DIC and



171 epifluorescence micrographs, respectively, of a medial section of an enclosing embryo  
172 grown at 15°C reveals epithelial-specific expression and leakiness in the expression  
173 system. **f, g)** 100x DIC and epifluorescence micrographs, respectively, of medial sections  
174 of enclosed (center) and earlier stage (right) embryos grown at 23°C demonstrate  
175 elevated temperature-specific expression in epithelial cells and the absence of expression  
176 in earlier embryos, when *lin-26* expression is not activated and epithelial fate remains  
177 unspecified. See **Supplementary Figure 6** for hypodermal expression in different focal  
178 planes. **h,i)** 60x DIC images of *rels6* animals expressing constitutively activated CA-  
179 Rac<sup>CED-10</sup> at 15°C and 23°C, respectively. **h)** Animals grown at 15°C show a mixture of  
180 stages or hatched L1, and **i)** animals picked after growth for 24 hrs at 25°C show 100%  
181 rupture or arrested elongation. **j)** A curve of animal defects and survival at stepped  
182 temperatures from 15-24°C. Animals were binned into different classes based on  
183 morphology. “Abnormal” = observed lumps on the surface of hatched animals.  
184 “Unelongated” = intact embryos that failed to elongate. “Ruptured” = embryos that failed  
185 enclosure and so therefore exploded.

186

187 **Figure 2: Genetic and pharmacological blockade of constitutively activated CED-**  
188 **10/Rac. a)** In the *smg-1(cc546ts); rels6[Plin-26::ced-10(Q61L)::NMD<sup>S</sup>3’UTR]*  
189 background, different mutations reduced levels of lethality. Two independent strain  
190 constructions with the *max-2(nv162)* mutation in the known Rac effector Pak suppressed  
191 lethality. Not shown is a synthetic lethal phenotype of *smg-1(cc546ts); rels6* in  
192 combination with disruption of the other Pak ortholog, *pak-1(ok448)*. We constructed a  
193 strain with *pak-1(ok448)* as a heterozygote but could not homozygose the *pak-1* mutant

194 chromosome. Unlike MAX-2/Pak, PAK-1/Pak has been implicated as an effector of both  
195 CED-10/Rac and CDC-42/Cdc42, as well as a GTPase- and kinase-independent  
196 component of the Pak-Pix-Git1 complex that regulates the cytoskeleton<sup>13,14,17</sup>. Thus,  
197 disruption of PAK-1, unlike disruption of MAX-2, is expected to impact multiple signaling  
198 systems, perhaps explaining the synthetic lethality observed when PAK-1 is deleted in  
199 the CA-CED-10/Rac transgenic background at any temperature. A putative null mutation  
200 in PES-7/IQGAP, *pes-7(gk123)*, a putative Rac effector identified in mammalian studies<sup>18</sup>,  
201 weakly suppressed lethality, while mutations in other Rac effectors PKN-1/PKN (*pkn-*  
202 *1(ok1673)*)<sup>19</sup> and UNC-115/AbLIM (*unc-115(e2225)*)<sup>20</sup> failed to suppress. **b)** Rescue of  
203 toxicity of constitutively active CED-10/Rac at higher concentrations of the Rac inhibitor,  
204 EHT 1864. Classes of phenotypes were binned as in **Figure 1. c)** DIC image of an embryo  
205 conditionally expressing GFP at 23°C. The lumen of the pharynx is out of the plane of  
206 focus, facing left. **d)** DIC image of a ruptured embryo conditionally expressing CA-  
207 Rac/CED-10 at 23°C. The lumen of the intact pharynx is in focus and facing left (white  
208 arrowhead), indicating that development persists even when epithelial morphogenesis is  
209 disrupted. **e)** DIC image of an embryo conditionally expressing constitutively activated  
210 Rac/CED-10 at 23°C and grown on 1% DMSO. The lumen of the intact pharynx is in focus  
211 and facing downward (white arrowhead). **f)** DIC image of an embryo conditionally  
212 expressing constitutively activated Rac/CED-10 at 23°C and grown on 30 mM EHT 1864  
213 in 1% DMSO.

214

215

216

217 **References**

- 218 1 Beitel, G. J., Clark, S. G. & Horvitz, H. R. Caenorhabditis elegans ras  
219 gene let-60 acts as a switch in the pathway of vulval induction. *Nature*  
220 **348**, 503-509, doi:10.1038/348503a0 (1990).
- 221 2 Han, M. & Sternberg, P. W. let-60, a gene that specifies cell fates during  
222 C. elegans vulval induction, encodes a ras protein. *Cell* **63**, 921-931,  
223 doi:10.1016/0092-8674(90)90495-z (1990).
- 224 3 Kornfeld, K., Hom, D. B. & Horvitz, H. R. The ksr-1 gene encodes a novel  
225 protein kinase involved in Ras-mediated signaling in C. elegans. *Cell* **83**,  
226 903-913 (1995).
- 227 4 Sundaram, M. & Han, M. The C. elegans ksr-1 gene encodes a novel Raf-  
228 related kinase involved in Ras-mediated signal transduction. *Cell* **83**, 889-  
229 901 (1995).
- 230 5 Sieburth, D. S., Sun, Q. & Han, M. SUR-8, a conserved Ras-binding  
231 protein with leucine-rich repeats, positively regulates Ras-mediated  
232 signaling in C. elegans. *Cell* **94**, 119-130, doi:10.1016/s0092-  
233 8674(00)81227-1 (1998).
- 234 6 Selfors, L. M., Schutzman, J. L., Borland, C. Z. & Stern, M. J. soc-2  
235 encodes a leucine-rich repeat protein implicated in fibroblast growth factor  
236 receptor signaling. *Proc Natl Acad Sci U S A* **95**, 6903-6908,  
237 doi:10.1073/pnas.95.12.6903 (1998).
- 238 7 Chisholm, A. D. & Hardin, J. Epidermal morphogenesis. *WormBook*, 1-22,  
239 doi:10.1895/wormbook.1.35.1 (2005).
- 240 8 Landmann, F., Quintin, S. & Labouesse, M. Multiple regulatory elements  
241 with spatially and temporally distinct activities control the expression of the  
242 epithelial differentiation gene lin-26 in C. elegans. *Dev Biol* **265**, 478-490  
243 (2004).
- 244 9 Calixto, A., Ma, C. & Chalfie, M. Conditional gene expression and RNAi  
245 using MEC-8-dependent splicing in C. elegans. *Nat Methods* **7**, 407-411,  
246 doi:10.1038/nmeth.1445 (2010).
- 247 10 Conradt, B. & Horvitz, H. R. The C. elegans protein EGL-1 is required for  
248 programmed cell death and interacts with the Bcl-2-like protein CED-9.  
249 *Cell* **93**, 519-529 (1998).
- 250 11 Walck-Shannon, E., Reiner, D. & Hardin, J. Polarized Rac-dependent  
251 protrusions drive epithelial intercalation in the embryonic epidermis of C.  
252 elegans. *Development* **142**, 3549-3560, doi:10.1242/dev.127597 (2015).
- 253 12 Walck-Shannon, E. *et al.* CDC-42 Orients Cell Migration during Epithelial  
254 Intercalation in the Caenorhabditis elegans Epidermis. *PLoS Genet* **12**,  
255 e1006415, doi:10.1371/journal.pgen.1006415 (2016).
- 256 13 Lucanic, M., Kiley, M., Ashcroft, N., L'Etoile, N. & Cheng, H. J. The  
257 Caenorhabditis elegans P21-activated kinases are differentially required  
258 for UNC-6/netrin-mediated commissural motor axon guidance.  
259 *Development* **133**, 4549-4559, doi:10.1242/dev.02648 (2006).
- 260 14 Peters, E. C., Gossett, A. J., Goldstein, B., Der, C. J. & Reiner, D. J.  
261 Redundant canonical and noncanonical Caenorhabditis elegans p21-

- 262 activated kinase signaling governs distal tip cell migrations. *G3 (Bethesda)*  
263 **3**, 181-195, doi:10.1534/g3.112.004416 (2013).
- 264 15 Desire, L. *et al.* RAC1 inhibition targets amyloid precursor protein  
265 processing by gamma-secretase and decreases Abeta production in vitro  
266 and in vivo. *J Biol Chem* **280**, 37516-37525, doi:10.1074/jbc.M507913200  
267 (2005).
- 268 16 Shutes, A. *et al.* Specificity and mechanism of action of EHT 1864, a novel  
269 small molecule inhibitor of Rac family small GTPases. *J Biol Chem* **282**,  
270 35666-35678, doi:10.1074/jbc.M703571200 (2007).
- 271 17 Hoefen, R. J. & Berk, B. C. The multifunctional GIT family of proteins. *J*  
272 *Cell Sci* **119**, 1469-1475, doi:10.1242/jcs.02925 (2006).
- 273 18 Watanabe, T., Wang, S. & Kaibuchi, K. IQGAPs as Key Regulators of  
274 Actin-cytoskeleton Dynamics. *Cell Struct Funct* **40**, 69-77,  
275 doi:10.1247/csf.15003 (2015).
- 276 19 Lu, Y. & Settleman, J. The Drosophila Pkn protein kinase is a Rho/Rac  
277 effector target required for dorsal closure during embryogenesis. *Genes*  
278 *Dev* **13**, 1168-1180 (1999).
- 279 20 Struckhoff, E. C. & Lundquist, E. A. The actin-binding protein UNC-115 is  
280 an effector of Rac signaling during axon pathfinding in *C. elegans*.  
281 *Development* **130**, 693-704 (2003).  
282

# Pedone Fig. 1

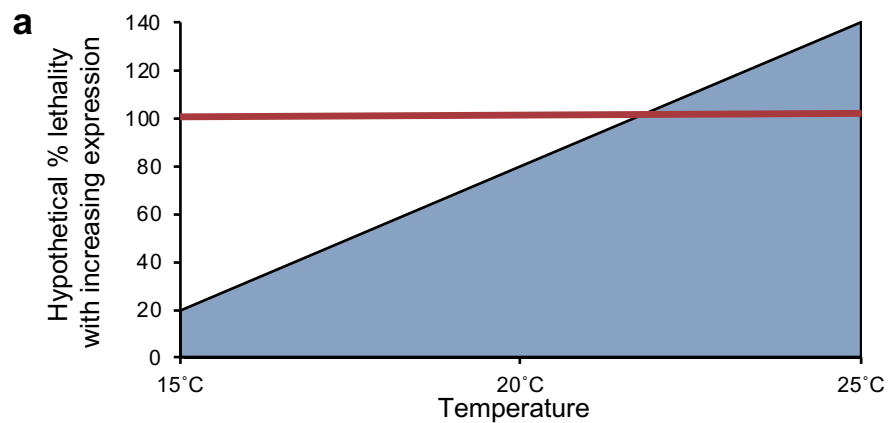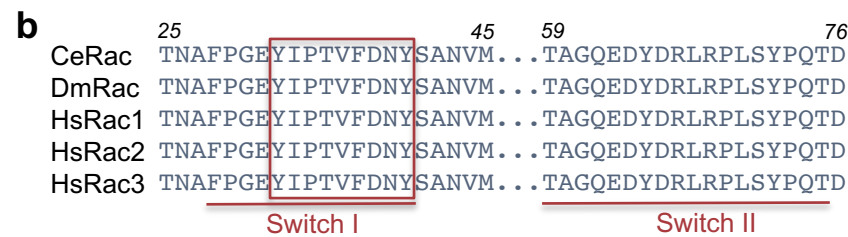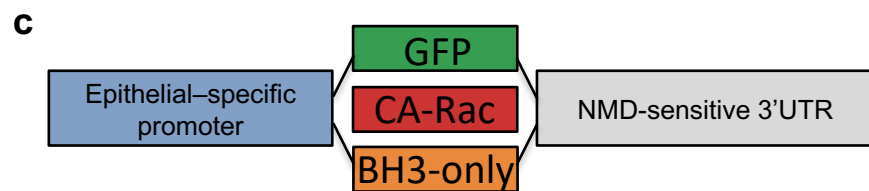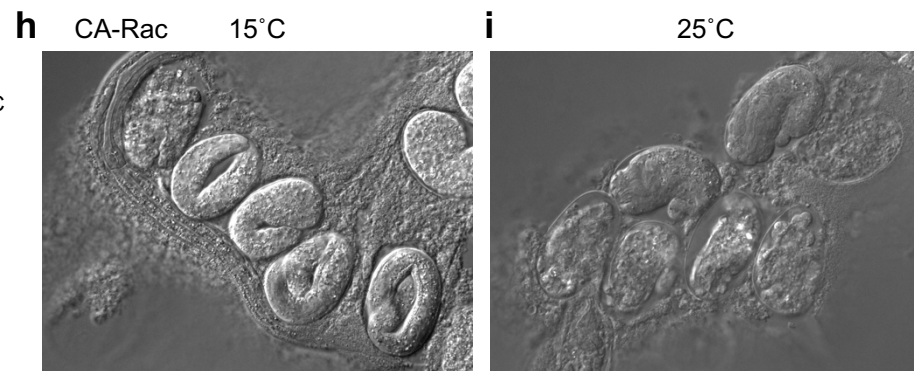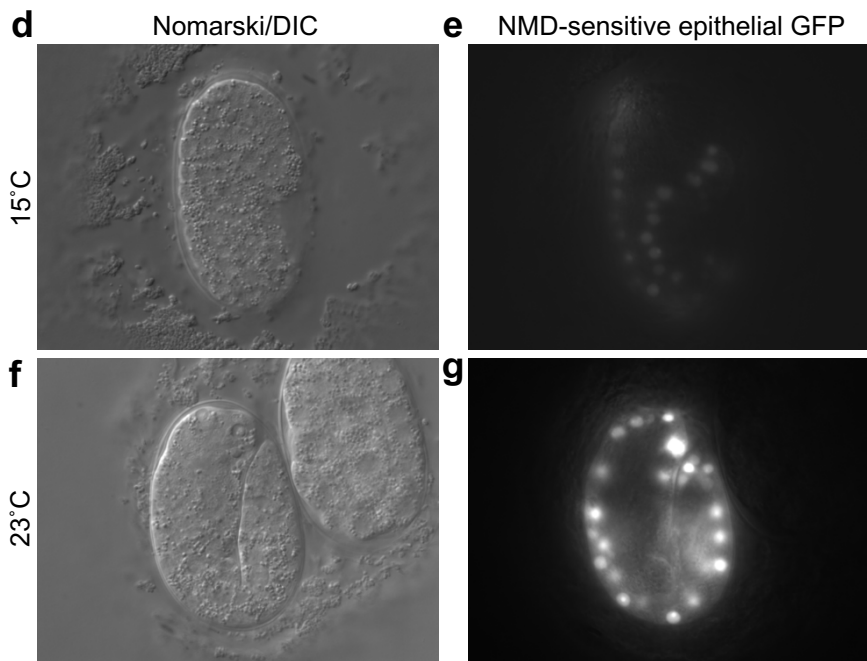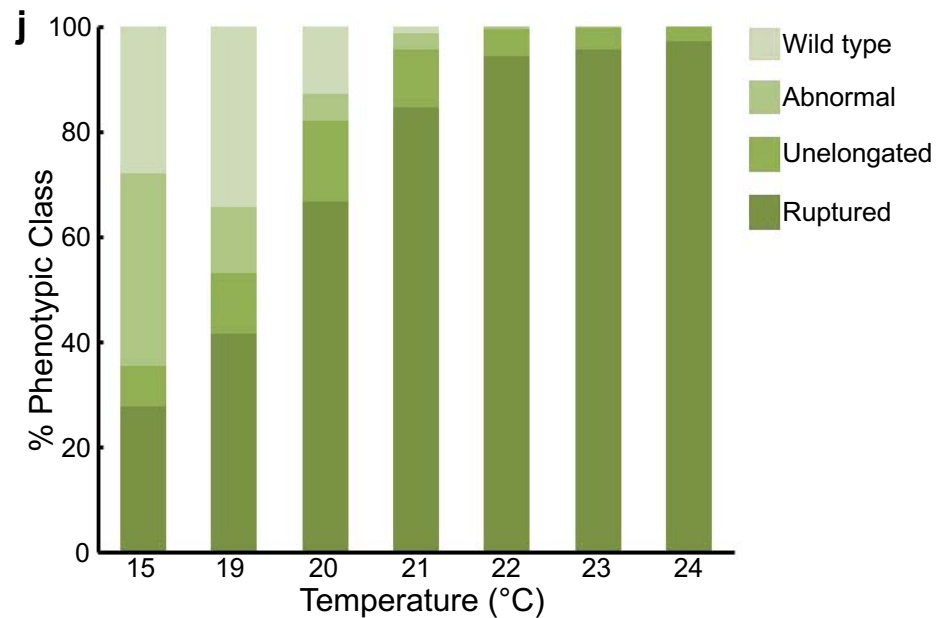

**Figure 1. A system for conditional expression of signaling proteins to titrate to 100% functional threshold.** **a)** A hypothetical graph of temperature-controlled levels of gene product required to reach the threshold of 100% lethality. **b)** 100% residue identity among Rac GTPases of *C. elegans*, *Drosophila melanogaster*, and humans in the structurally critical Switch I and II regions that harbor the core effector binding sequence (boxed). **c)** A schematic of plasmids for conditional expression of proteins, either control GFP, constitutively activated CED-10/Rac, or pro-apoptotic BH3-only protein EGL-1. The promoter is the “eFGHi” variant of the *lin-26* promoter, which drives expression in hypodermis (epithelial) cells in the embryo; the NMD-sensitive 3’UTR is inverted coding sequences from the *let-858* gene (A. Fire, pers. comm.). **d-g)** Temperature control of epithelial-specific expression from integrated transgene *rels8* of GFP in epithelial cells under control of the hypodermal promoter and NMD-sensitive 3’UTR, in a *smg-1(cc546ts)* mutant background for temperature-sensitive perturbation of NMD. **d, e)** 100x DIC and epifluorescence micrographs, respectively, of a medial section of an enclosing embryo grown at 15°C reveals epithelial-specific expression and leakiness in the expression system. **f, g)** 100x DIC and epifluorescence micrographs, respectively, of medial sections of enclosed (center) and earlier stage (right) embryos grown at 23°C demonstrate elevated temperature-specific expression in epithelial cells and the absence of expression in earlier embryos, when *lin-26* expression is not activated and epithelial fate remains unspecified. See **Supplementary Figure 6** for hypodermal expression in different focal planes. **h,i)** 60x DIC images of *rels6* animals expressing constitutively activated CA-Rac<sup>CED-10</sup> at 15°C and 23°C, respectively. **h)** Animals grown at 15°C show a mixture of stages or hatched L1, and **i)** animals picked after growth for 24 hrs at 25°C show 100% rupture or arrested elongation. **j)** A curve of animal defects and survival at stepped temperatures from 15-24°C. Animals were binned into different classes based on morphology. “Abnormal” = observed lumps on the surface of hatched animals. “Unelongated” = intact embryos that failed to elongate. “Ruptured” = embryos that failed enclosure and so therefore exploded.

# Pedone Fig. 2

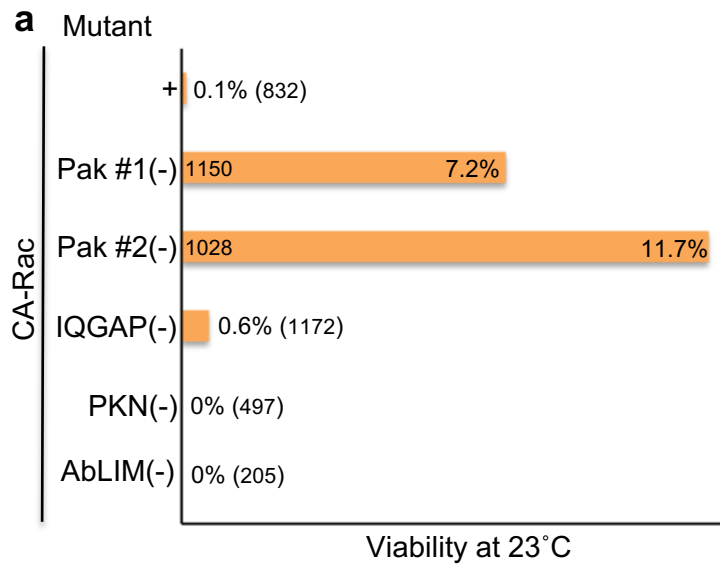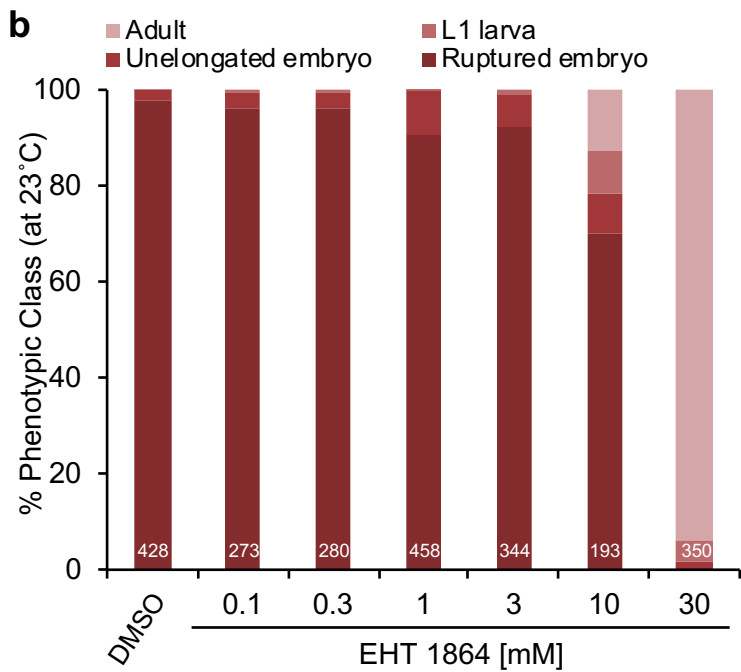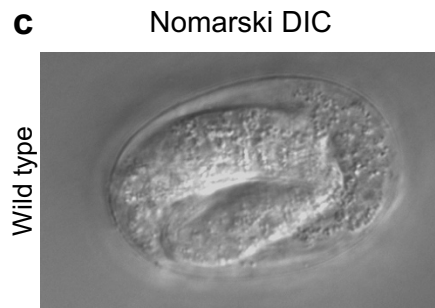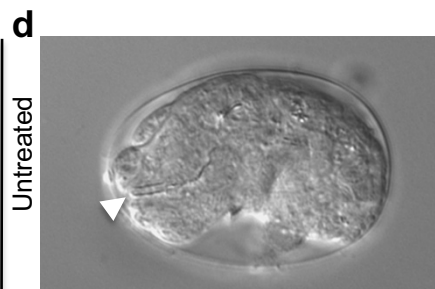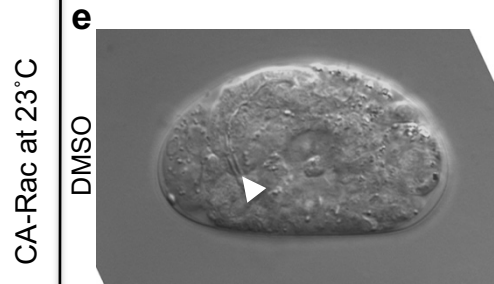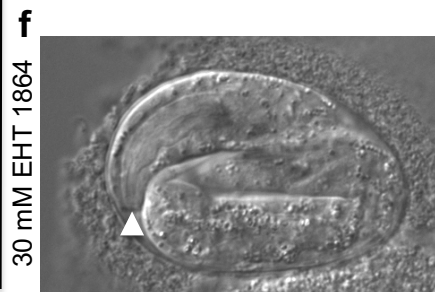

**Figure 2: Genetic and pharmacological blockade of constitutively activated CED-10/Rac.** **a)** In the *smg-1(cc546ts); rels6[Plin-26::ced-10(Q61L)::NMD<sup>S</sup>3'UTR]* background, different mutations reduced levels of lethality. Two independent strain constructions with the *max-2(nv162)* mutation in the known Rac effector Pak suppressed lethality. Not shown is a synthetic lethal phenotype of *smg-1(cc546ts); rels6* in combination with disruption of the other Pak ortholog, *pak-1(ok448)*. We constructed a strain with *pak-1(ok448)* as a heterozygote but could not homozygose the *pak-1* mutant chromosome. Unlike MAX-2/Pak, PAK-1/Pak has been implicated as an effector of both CED-10/Rac and CDC-42/Cdc42, as well as a GTPase- and kinase-independent component of the Pak-Pix-Git1 complex that regulates the cytoskeleton<sup>13,14,17</sup>. Thus, disruption of PAK-1, unlike disruption of MAX-2, is expected to impact multiple signaling systems, perhaps explaining the synthetic lethality observed when PAK-1 is deleted in the CA-CED-10/Rac transgenic background at any temperature. A putative null mutation in PES-7/IQGAP, *pes-7(gk123)*, a putative Rac effector identified in mammalian studies<sup>18</sup>, weakly suppressed lethality, while mutations in other Rac effectors PKN-1/PKN (*pkn-1(ok1673)*)<sup>19</sup> and UNC-115/AbLIM (*unc-115(e2225)*)<sup>20</sup> failed to suppress. **b)** Rescue of toxicity of constitutively active CED-10/Rac at higher concentrations of the Rac inhibitor, EHT 1864. Classes of phenotypes were binned as in **Figure 1**. **c)** DIC image of an embryo conditionally expressing GFP at 23°C. The lumen of the pharynx is out of the plane of focus, facing left. **d)** DIC image of a ruptured embryo conditionally expressing CA- Rac/CED-10 at 23°C. The lumen of the intact pharynx is in focus and facing left (white arrowhead), indicating that development persists even when epithelial morphogenesis is disrupted. **e)** DIC image of an embryo conditionally expressing constitutively activated Rac/CED-10 at 23°C and grown on 1% DMSO. The lumen of the intact pharynx is in focus and facing downward (white arrowhead). **f)** DIC image of an embryo conditionally expressing constitutively activated Rac/CED-10 at 23°C and grown on 30 mM EHT 1864 in 1% DMSO.



# 1 **Supplementary information for**

## 2 **Engineering Threshold-Based Selection Systems**

3 Katherine H. Pedone, Vanessa González-Pérez, Luciana E. Leopold, Channing J. Der, Adrienne D. Cox,  
4 Shawn Ahmed and David J. Reiner

| 6 <b>CONTENTS</b>                                                                           | page  |
|---------------------------------------------------------------------------------------------|-------|
| 7 Supplementary Methods                                                                     | 2-3   |
| 8 Supplementary Figure 1: Epithelial-specific GFP expression at 15°C                        | 4     |
| 9 Supplementary Figure 2: NMD-dependent differences in gene expression                      | 5     |
| 10 Supplementary Figure 3: A <i>smg-1</i> temperature-sensitive allele regulates locomotion | 6     |
| 11 Supplementary Figure 4: TS NMD-sensitive <i>unc-97(su110)</i> .                          | 7     |
| 12 Supplementary Figure 5: RT-PCR detection of NMD-dependent differences                    | 8     |
| 13 Supplementary Figure 6: Identification of lesions in <i>smg-1</i>                        | 9     |
| 14 Supplementary Table 1: Lethality conferred by component reagents                         | 10    |
| 15 Supplementary Figure 7: Weak morphogenetic phenotypes                                    | 11    |
| 16 Supplementary Table 2: EGL-1/BH3-only-induced lethality is caspase-dependent             | 12    |
| 17 Supplementary Figure 8: EHT 1864 rescue vs. negative control EHT 8560                    | 13    |
| 18 Supplementary Table 3: <i>C. elegans</i> strains used in this study                      | 14    |
| 19 Supplementary Table 5: Plasmids used in this study                                       | 15    |
| 20 Supplementary Table 4: Primers used in this study                                        | 16    |
| 21 Supplementary protocol for generating toxic transgenes                                   | 17-22 |
| 22 Supplementary figure legends                                                             | 23-25 |
| 23 Supplementary Bibliography                                                               | 26    |

## 24 **Supplementary Methods**

25 **Strains and animal handling.** Animals were cultured as described<sup>1</sup> and handled in the default 20°C  
26 incubator if not otherwise noted, or in dedicated 15°C, 23°C or 25°C incubators. T-curves were performed  
27 in an incubator changed stepwise for each temperature. Strains used in this study are presented in  
28 **Supplementary Table 3.**

29  
30 **Microscopy.** Animals were mounted in 2 mM tetramisole/M9 buffer on slides with agar pads. Animals were  
31 imaged with a Nikon Eclipse TE2000U microscope equipped with DIC optics, 40x, 60x and 100x oil  
32 objectives, with a DVC-1412 CCD camera (Digital Video Camera Company) controlled by Hamamatsu  
33 SimplePCI acquisition software. Some animal handling and imaging was performed on a Leica  
34 stereofluorescence microscope equipped with automated zoom optics.

35  
36 **Small molecule treatment.** Pharmacological treatment with EHT 1864 and inactive analog EHT 8560  
37 (provided by Virginie Picard, Exon Hit Therapeutics) was performed in 6-well microtiter plates with small  
38 volumes of agar, with only corner wells used. EHT 1864 was diluted to the appropriate concentration in 1%  
39 DMSO, with 1% DMSO without inhibitor as a control. Animals were grown in an incubator dedicated to  
40 23°C, with all animals for a given assay grown in parallel.

41  
42 **Locomotion assay.** Animals were subjected to a circumferential locomotion assay as described  
43 previously<sup>2</sup>. Briefly, young adult animals were picked to the center of a 10 cm plate seeded 1 day previously,  
44 the origin was marked on the bottom, and animals were allowed to roam freely for 20 min, at which point  
45 they were arrested by placing at -20°C for 5 min. The distance from the origin was measured for each  
46 animal.

47

48 **Molecular biology.** Details of plasmid construction and PCR detection of mutations is available upon  
49 request. Primers used in this study are presented in **Supplementary Table 4**. Plasmids used are presented  
50 in **Supplementary Table 5**.

51

52 Pedone Supplementary Fig. 1

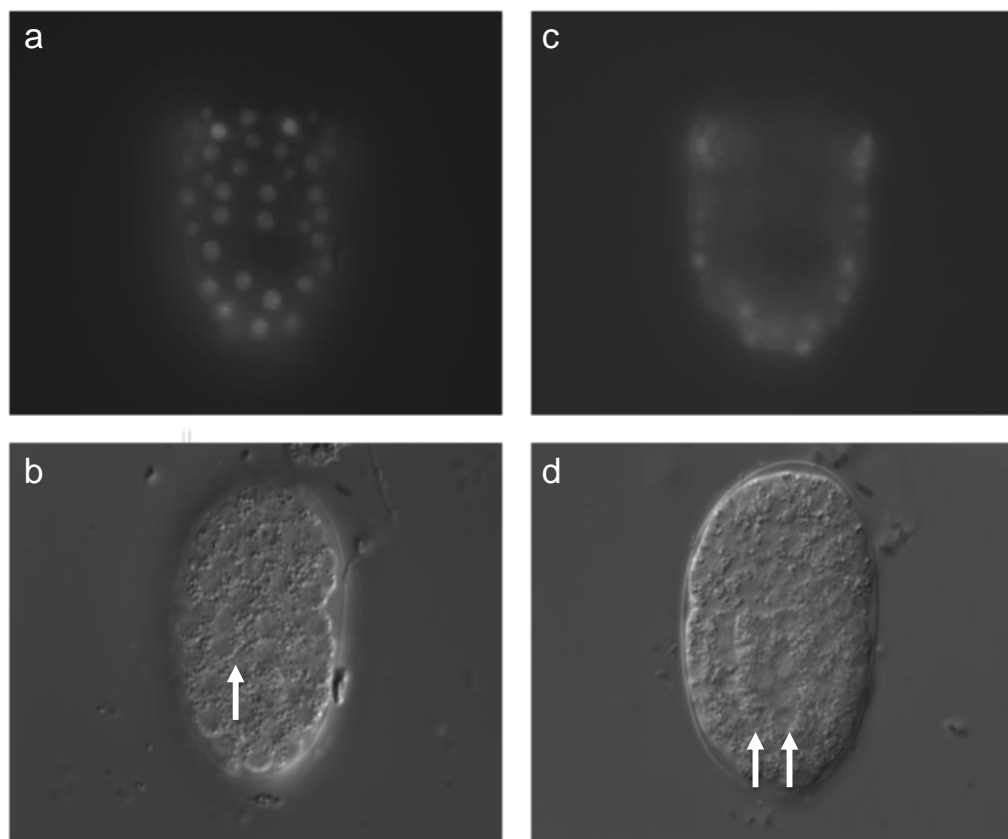

**Supplementary Figure 1. Epithelial-specific GFP expression at 15°C.** a-d) The same early enclosure staged *smg-1(cc546ts); rels8[P<sub>lin-26</sub>::gfp::NMD<sup>S</sup>3'UTR]* embryo in different focal planes. a, b) Epifluorescence (500 msec exposure) and DIC images, respectively, of the dorsal surface of the embryo, with arrows indicating a row of intercalating epithelial cells. c, d) Epifluorescence (500 msec exposure) and DIC images, respectively, of a medial section of the embryo, with arrows indicating the column of intestinal cells.

62 Pedone Supplementary Fig. 2

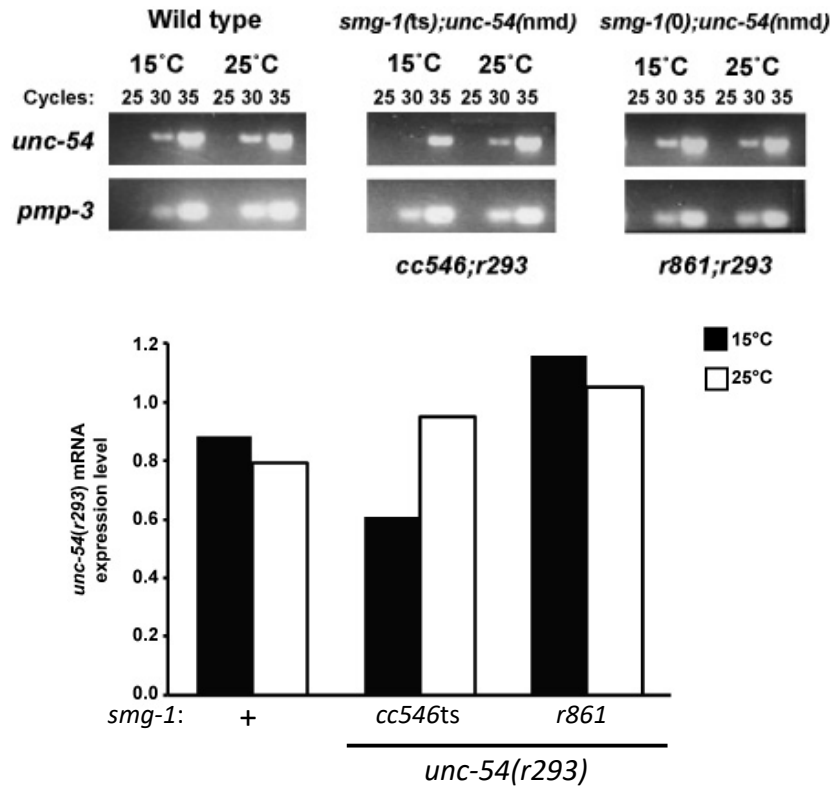

**Supplementary Figure 2. NMD-dependent differences in gene expression.** Animals harboring the *cc546* temperature-sensitive mutation in *smg-1* have increased *unc-54(r293)* mRNA levels at 25°C by RT-PCR, with *pmp-3* RNA as a control. RNA extractions were performed on pools of adult animals raised at either 15°C or 25°C. cDNA preparations of each strain were subjected to 25, 30 or 35 cycles of PCR with *unc-54*-specific primers. Temperature-dependent differences were visible at 30 cycles with the *cc546ts* allele of *smg-1* used in this study but not the *smg-1(+)* or *smg-1(r861)* putative null mutation, as shown in the graph. Band intensities were quantified using the Image J gel analysis tool. Experiment was performed two times.

63

### Pedone Supplementary Fig. 3

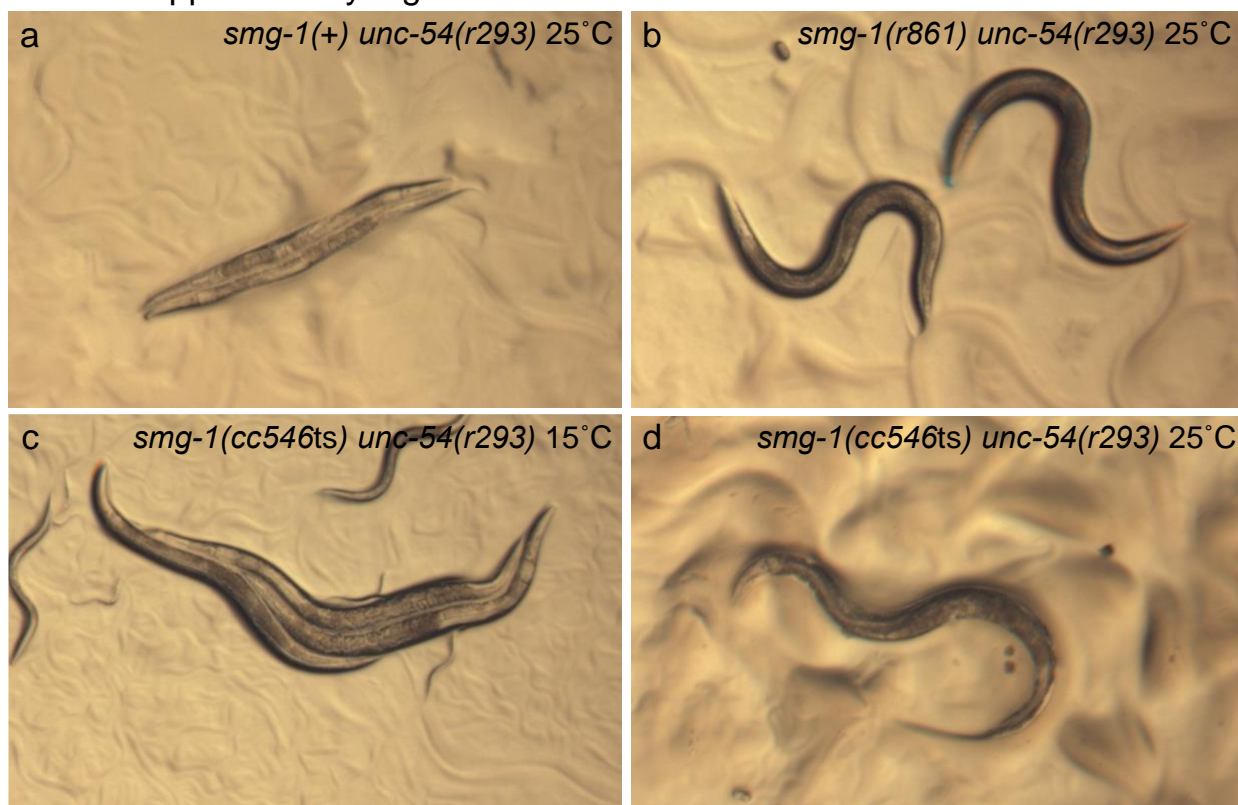

**Supplementary Figure 3: A *smg-1* temperature-sensitive allele regulates locomotion.** All strain backgrounds harbor NMD-sensitive *unc-54(r293)*. Photomicrographs were captured from agar plates with 25 msec exposures under same lamp settings. Body posture is representative of locomotion and hence myosin production by the *unc-54* gene and its NMD-sensitive mutation in the *unc-54* 3'UTR, *r293*: deep body bends represent typical locomotion, shallow bends represent flaccid paralysis. **a)** *unc-54(r293)* animals were paralyzed and egg-laying defective (Egl). **b)** The locomotion and Egl defects of the *r293* mutant were strongly rescued by loss of *smg-1* function. **c)** Locomotion and Egl defects were not as severe with *cc546ts* as with *smg-1(+)* at 15°C and **d)** are completely suppressed at 25°C, consistent with *cc546ts* being temperature sensitive.

64

#### Pedone Supplementary Fig. 4

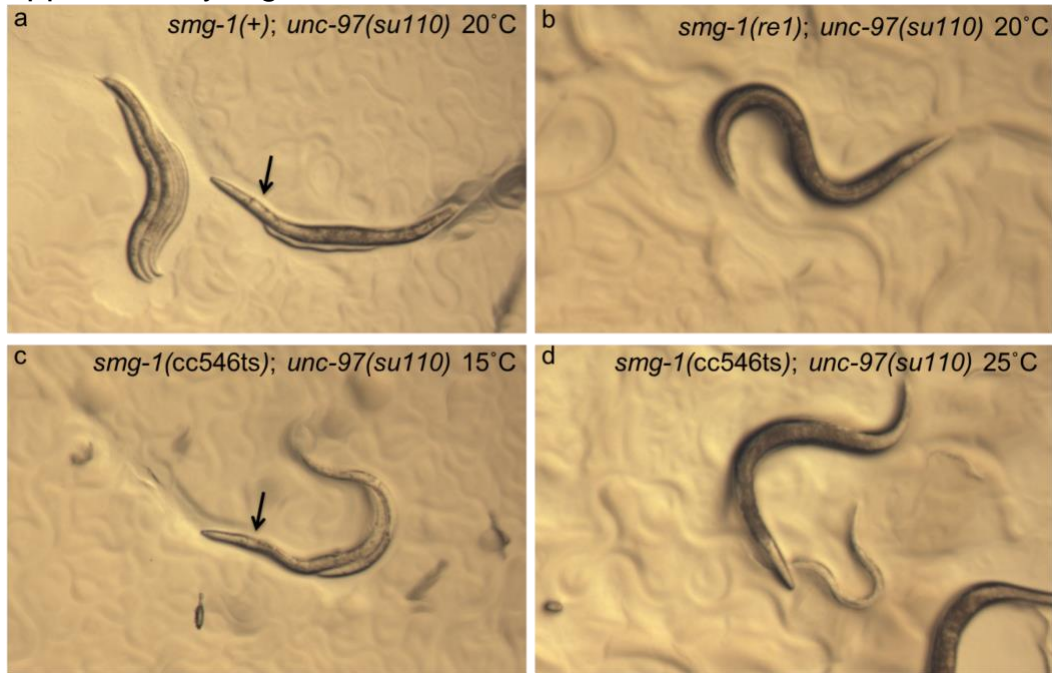

**Supplementary Figure 4: TS NMD-sensitive *unc-97(su110)*.** Upon crossing into the reference strain for *unc-97(su110)*, HE110, we observed that the strain contained a background mutation partially suppressing the Unc phenotype of *unc-97(su110)*. Whole genome sequencing of this strain identified a nonsense mutation in *smg-1*, which we named *re1* (see **Supplementary Figure 6**). Photomicrographs were captured from agar plates with 25 msec exposures under same lamp settings. Body posture is representative of locomotion and hence PINCH production by the *unc-97* gene and its NMD-sensitive mutation in the *unc-54* 3'UTR, *r293*: deep body bends represent typical locomotion, shallow bends represent flaccid paralysis. Arrows point to a clear area posterior to the pharynx that indicates a clear patch in the intestine that indicates distension with liquid due to defective defecation. **a)** *unc-97(su110)* animals alone are paralyzed, Egl, and constipated. **b)** These phenotypes are suppressed by the *smg-1(re1)* mutation crossed back into the *unc-97(su110)* background, **c)** not suppressed by *smg-1(cc546ts)* at 15°C but **d)** suppressed by *smg-1(cc546ts)* at 25°C. Mutants for *unc-97* have been reported to have mechanosensory defects (Chen and Chalfie, 2014), and are thereby sluggish and do not move on plate assays. Consequently, we did not include *unc-97(su110)* in our locomotion analysis for **Supplementary Figure 5**.

65 Pedone Supplementary Fig. 5

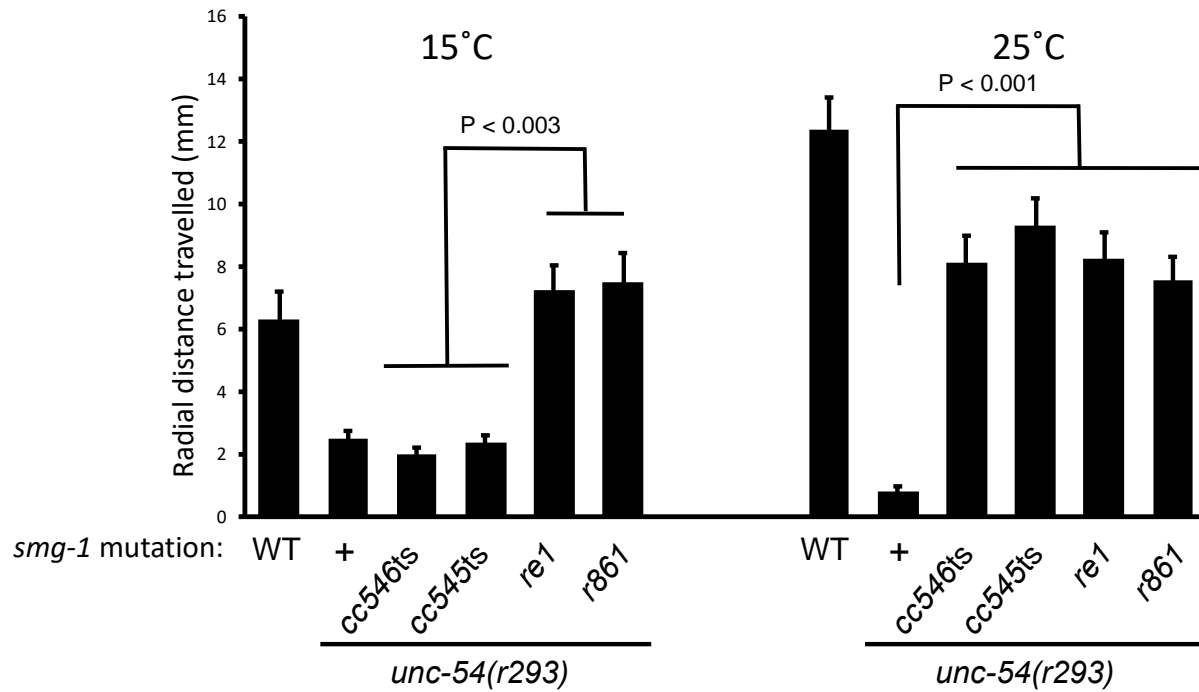

**Supplementary Figure 5. RT-PCR detection of NMD-dependent differences.** Putative null mutations in *smg-1* suppress locomotion defects conferred by the aberrant *unc-54(re293)* 3'UTR at both 15°C and 25°C. *smg-1(cc545ts)* and *smg-1(cc546ts)* fail to rescue locomotion defects at 15°C but rescue at 25°C. All animals were scored in sequential assays on the same day, 20 minute assays, then transferred to -20°C for 5 minutes to arrest locomotion, then counted.



66 Pedone Supplementary Fig. 6

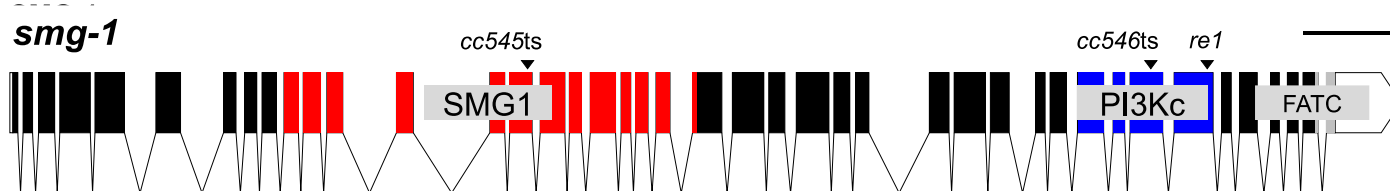

**Supplementary Figure 6: Identification of lesions in *smg-1*.** The exon-intron boundaries of the *smg-1* gene are shown. Domains are SMG1 (red), PI3Kc (blue) and FATC (gray), UTRs are white. Scale bar = 1000 bp. *cc545ts* is an ACA>ATA transition in exon 15 that causes a T761I missense change. *cc546ts* is an unusual ATG>TTG transversion in exon 35 that causes a M1957L missense change. *re1* is an unusual GAG>TAG transversion in exon 36 that causes an E2093\* nonsense change. *cc546ts* is detectable by SNP-snip: restriction enzyme Msi I cuts the wild-type but not the mutant sequence.

67

**Table S1: Lethality conferred by component reagents**

| Genotype                                                                     | 15°C            | 23°C             |
|------------------------------------------------------------------------------|-----------------|------------------|
| <i>smg-1(cc546ts); rels8[P<sub>lin-26</sub>::GFP::NMD<sup>S</sup> 3'UTR]</i> | 1.9%<br>(4/216) | 1.4%<br>(6/423)  |
| <i>smg-1(cc546ts)</i>                                                        | 0.9%<br>(3/337) | 2.0%<br>(10/522) |
| <i>rels8[P<sub>lin-26</sub>::GFP::NMD<sup>S</sup> 3'UTR]</i>                 | 1.1%<br>(3/284) | 1.2%<br>(5/431)  |

68

### Pedone Supplementary Fig. 7

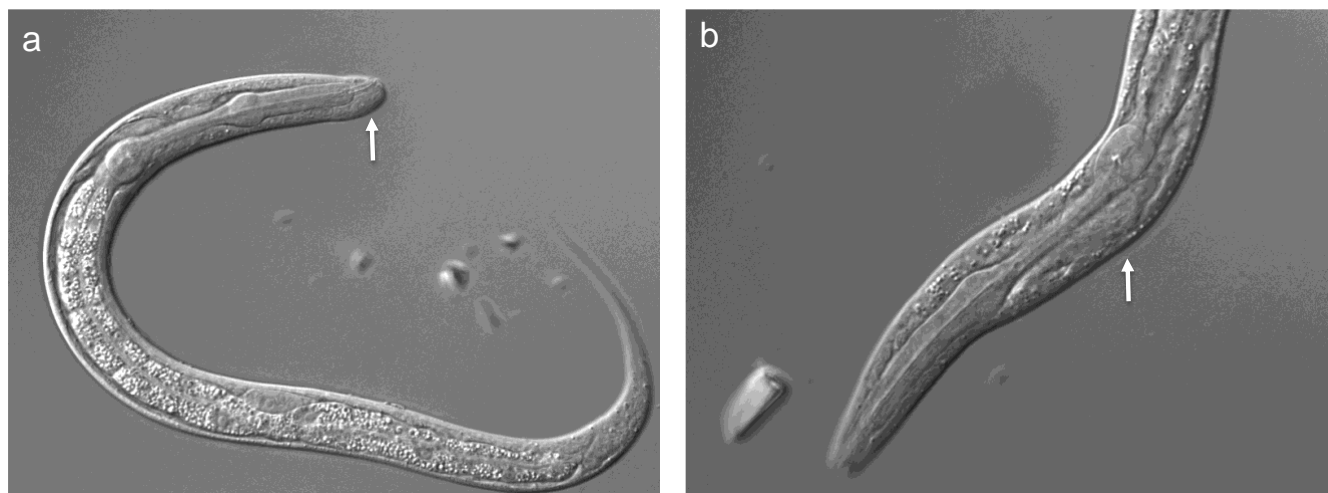

**Supplementary Figure 7. Weak morphogenetic phenotypes.** Low penetrance and low expressivity phenotypes are caused by the GFP over-expressing strain *smg-1(cc546ts); rels8[Plin-26::gfp::NMD<sup>S</sup>3'UTR]*, perhaps due to over-represented promoter sequences titrating factors important for morphogenesis. Arrows indicate mild bulges in the animal's epithelium, frequently around the head in animals grown at 23°C. Occasional animals with such bulges grew slower, presumably due to compromised feeding. In this experiment GFP lethality = 0.8% (4/453), WT lethality = 0.6% (4/671).

69

### Supplementary Table S2: EGL-1/BH3-only-induced lethality is caspase-dependent

| Genotype                                                                                       | RNAi         | % lethality <sup>a</sup> |
|------------------------------------------------------------------------------------------------|--------------|--------------------------|
| <i>smg-1(cc546ts); rels14[P<sub>lin-26</sub>::egl-1(+):NMD<sup>S</sup> 3'UTR]</i>              | <i>Luc.</i>  | 98.5 (321/326)           |
| <i>smg-1(cc546ts); rels14[P<sub>lin-26</sub>::egl-1(+):NMD<sup>S</sup> 3'UTR]</i>              | <i>ced-3</i> | 84.8 (245/289)           |
| <i>smg-1(cc546ts); ced-3(n717); rels14[P<sub>lin-26</sub>::egl-1(+):NMD<sup>S</sup> 3'UTR]</i> | <i>Luc.</i>  | 11.4 (22/193)            |

<sup>a</sup>Animals were grown at 25°C.

70

### Pedone Supplementary Fig. 8

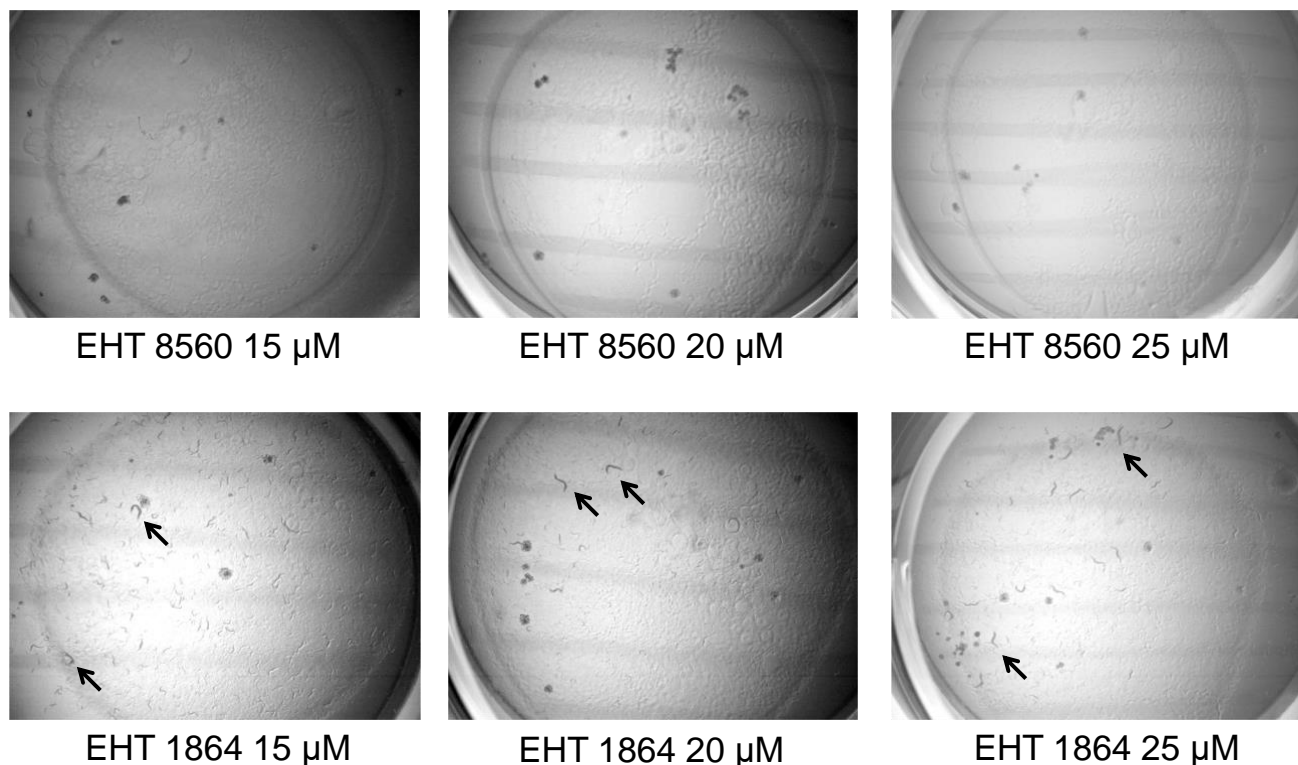

**Supplementary Figure 8. EHT 1864 rescue vs. negative control EHT 8560.** 6-well plate assays for small molecule rescue of lethality conferred by *smg-1(cc546ts)*; *rels6* lethality at 23°C. **Top row:** Synchronized groups of animals treated with increasing doses of negative control molecule EHT 8560. None survive to hatch. (Tracks are left by Rol parents that laid the eggs). **Bottom row:** Synchronized groups of animals treated with increasing doses of Rac inhibitor EHT 1864. Arrows indicate a subset of grown adults, but many smaller larvae are evident. In all images, dark spots are salt crystals in the agar.

Supplementary Table 3: *C. elegans* strains used in this study

| Strain # | Genotype                                                                                                                                                           |
|----------|--------------------------------------------------------------------------------------------------------------------------------------------------------------------|
| DV2135   | <i>rels6</i> [ <i>P<sub>lin-26</sub>::ced-10(gf)::NMD<sup>S</sup> 3'UTR+P<sub>myo-2</sub>::gfp+rol-6(d)</i> ] III                                                  |
| DV2149   | <i>smg-1(cc546ts)</i> I; <i>rels6</i> [ <i>P<sub>lin-26</sub>::ced-10(gf)::NMD<sup>S</sup> 3'UTR+P<sub>myo-2</sub>::gfp+rol-6(d)</i> ] III                         |
| DV2271   | <i>smg-1(cc546ts)</i> I; <i>max-2(nv162)</i> II; <i>rels6</i> [ <i>P<sub>lin-26</sub>::ced-10(gf)::NMD<sup>S</sup> 3'UTR+P<sub>myo-2</sub>::gfp+rol-6(d)</i> ] III |
| DV2272   | <i>smg-1(cc546ts)</i> I; <i>max-2(nv162)</i> II; <i>rels6</i> [ <i>P<sub>lin-26</sub>::ced-10(gf)::NMD<sup>S</sup> 3'UTR+P<sub>myo-2</sub>::gfp+rol-6(d)</i> ] III |
| DV2286   | <i>smg-1(cc546ts)</i> I; <i>rels6</i> [ <i>P<sub>lin-26</sub>::ced-10(gf)::NMD<sup>S</sup> 3'UTR+P<sub>myo-2</sub>::gfp+rol-6(d)</i> ] III; <i>unc115(ky275)</i> X |
| DV2314   | <i>smg-1(cc546ts)</i> <i>pes-7(gk123)</i> I; <i>rels6</i> [ <i>P<sub>lin-26</sub>::ced-10(gf)::NMD<sup>S</sup> 3'UTR+P<sub>myo-2</sub>::gfp+rol-6(d)</i> ] III     |
| DV2316   | <i>smg-1(cc546ts)</i> I; <i>pkn-1(ok1673)</i> X; <i>rels6</i> [ <i>P<sub>lin-26</sub>::ced-10(gf)::NMD<sup>S</sup> 3'UTR+P<sub>myo-2</sub>::gfp+rol-6(d)</i> ] III |
| DV2157   | <i>smg-1(cc546ts)</i> <i>unc-54(r293)</i> I                                                                                                                        |
| DV2196   | <i>smg-1(re1)</i> <i>unc-54(r293)</i> I                                                                                                                            |
| PD8117   | <i>smg-1(cc545ts)</i> <i>unc-54(r293)</i> I                                                                                                                        |
| DV2652   | <i>smg-1(r861)</i> <i>unc-54(r293)</i> I                                                                                                                           |
| DV2208   | <i>unc-97(su110)</i> X                                                                                                                                             |
| DV2653   | <i>smg-1(r861)</i> I; <i>unc-97(su110)</i> X                                                                                                                       |
| DV2654   | <i>smg-1(cc545ts)</i> I; <i>unc-97(su110)</i> X                                                                                                                    |
| DV2658   | <i>smg-1(cc546ts)</i> I; <i>unc-97(su110)</i> X                                                                                                                    |
| HE110    | <i>smg-1(re1)</i> I; <i>unc-97(su110)</i> X                                                                                                                        |
| DV2208   | <i>unc-97(su110)</i> X 4x outcrossed                                                                                                                               |
| DV2471   | <i>smg-1(cc545ts)</i> I 2x outcrossed to DV2453                                                                                                                    |
| DV2376   | <i>rels14</i> [ <i>P<sub>lin-26</sub>::egl-1::NMD<sup>S</sup> 3'UTR + rol-6(d) + P<sub>myo-2</sub>::gfp</i> ] 4x outcrossed                                        |
| DV2437   | <i>smg-1(cc546ts)</i> I; <i>rels14</i> [ <i>P<sub>lin-26</sub>::egl-1::NMD<sup>S</sup> 3'UTR + rol-6(d) + P<sub>myo-2</sub>::gfp</i> ]                             |
| DV2348   | <i>smg-1(cc546ts)</i> I; <i>rels8</i> [ <i>P<sub>lin-26</sub>::gfp::NMD<sup>S</sup> 3'UTR + rol-6(d)</i> ] 4x backcrossed to <i>smg-1(cc546ts)</i>                 |
| DV2453   | <i>unc-87(e1459)</i> I 2x outcrossed                                                                                                                               |
| PD8120   | <i>smg-1(cc546ts)</i> I                                                                                                                                            |
| PD8119   | <i>smg-1(cc545ts)</i> I                                                                                                                                            |
| DV2683   | <i>smg-1(cc546ts)</i> I; <i>ced-3(n717)</i> IV; <i>rels14</i> [ <i>P<sub>lin-26</sub>::egl-1(+):NMD<sup>S</sup> 3'UTR</i> ]                                        |
|          |                                                                                                                                                                    |

71  
72

73  
74  
75  
76  
77  
78  
79  
80  
81  
82  
83  
84

85 **Supplementary Table 4: Plasmids used in this study**

86

| Plasmid name | Description                                                                    |
|--------------|--------------------------------------------------------------------------------|
| pML433       | <i>lin-26(eFGHi) enhancers::minimal myo-2 promoter::GFP</i>                    |
| pPD118.44    | <i>Synthetic NMD<sup>S</sup> 3'UTR (from inverted let-858 coding sequence)</i> |
| pCM1.3       | <i>P<sub>lin-26</sub>::synthetic let-858 NMD<sup>S</sup> 3'UTR</i>             |
| pCM1.4       | <i>P<sub>lin-26</sub>::gfp::synthetic let-858 NMD<sup>S</sup> 3'UTR</i>        |
| pCM3.2       | <i>P<sub>lin-26</sub>::ced-10(+)::synthetic let-858 NMD<sup>S</sup> 3'UTR</i>  |
| pCM3.3       | <i>P<sub>lin-26</sub>::ced-10(gf)::synthetic let-858 NMD<sup>S</sup> 3'UTR</i> |
| pCM12.2      | <i>P<sub>lin-26</sub>::egl-1::synthetic let-858 NMD<sup>S</sup> 3'UTR</i>      |
|              |                                                                                |
|              |                                                                                |
|              |                                                                                |
|              |                                                                                |
|              |                                                                                |

87

88  
89

**Supplementary Table 5: Oligonucleotides used in this study.**

| Oligos   | Sequence                                                      | Use                       |
|----------|---------------------------------------------------------------|---------------------------|
| DJR511   | TTTTTTggatccttaattaGTggccggccTTTTTCTGAGCTCGGTACCCTCC          | <i>P<sub>lin-26</sub></i> |
| DJR459   | TTTTTTggatccTggccggccACTCATTTTTTCTGAGCTCGGTACCCTCC            | <i>P<sub>lin-26</sub></i> |
| DJR528   | TTTTTTgcgggccgCCTCCAAAATCGTCTTCCGCTCTGA                       | <i>let-858</i><br>3' UTR  |
| DJR521   | TTTTTTggatccGCGATCGCggccggcCTTACTATAAAAAAGTTTGAATACAATTAAATTC | <i>let-858</i><br>3' UTR  |
| DJR504   | TTTTTTatcgatttaTTTGTATAGTTCATCCATGCCATG                       | GFP                       |
| DJR462   | TTTTTTggatccATGAGTAAAGGAGAAGAAGACTTTTC                        | GFP                       |
| DJR484   | AAAAAAAAggccggcctggcATGCAAGCGATCAAATGTGTCGTCG                 | <i>ced-10</i>             |
| DJR485   | TTTTTTatcgatTTAGAGCACCGTACACTTGCTCTTTTGG                      | <i>ced-10</i>             |
| DJR513   | GGGATACAGCTGGACTGGAAGATTACGATCGAC                             | Q61L                      |
| DJR514   | GTCGATCGTAATCTTCCAGTCCAGCTGTATCCC                             | Q61L                      |
| DJR571   | AAAAAaggccggcctggcATGCTGATGCTCACCTTTGCCCTC                    | <i>egl-1</i>              |
| DJR572   | AAAAAaccgggTTAAAAAGCGAAAAAGTCCAGAAGACG                        | <i>egl-1</i>              |
| KHP1     | GCAAGAGGTCCAAACAGTTCAGAGG                                     | <i>pkn-1</i>              |
| KHP2     | TGCTTGACTTGGACCAGAACGGTCG                                     | <i>pkn-1</i>              |
| KHP3     | CCAAGAAGCGTGAGGCCAGAGAAGC                                     | <i>pkn-1</i>              |
| KHP4     | ACGCCTATGGGGCCACAATGACC                                       | <i>pes-7</i>              |
| KHP5     | CGATTAAAAAGCAAGCGTACAGGC                                      | <i>pes-7</i>              |
| KHP6     | ACCTGTGTAGGTGTGAGGAAGTCC                                      | <i>pes-7</i>              |
| nv162.f1 | ccggcaggaagactatatgactc                                       | <i>max-2</i>              |
| nv162.r1 | CACAAAGAGGGAAGAAGATCCTC                                       | <i>max-2</i>              |
| nv162.r2 | CCTTCTTCTGATCGGCAAGACTG                                       | <i>max-2</i>              |
| DJR636   | ATGAGGGCATGTAATACACAAGTACCG                                   | <i>pak-1</i>              |
| DJR637   | TTGCATGCTTATTCTCACGCATCACC                                    | <i>pak-1</i>              |
| DJR638   | GAATCTCTTCCAGGGAAGTCGGG                                       | <i>pak-1</i>              |

90



## 91 **Supplementary Protocol**

92 We provide the following protocol to generate reagents that impose conditional lethality. Many of the  
93 principles are universal, while some of the tools and reagents discussed here are specific for use in *C.*  
94 *elegans*. The details for conditional expression of toxic proteins are likely to vary in other systems.

### 96 ***Selection of biological processes to target***

97 We targeted CED-10/Rac because of its high level of sequence and functional conservation. We expressed  
98 it specifically in epithelia undergoing morphogenesis because we wanted to avoid targeting cell fate  
99 decisions or cell proliferation. *The protein/pathway of interest to be targeted by each investigator is likely to*  
100 *be guided by their specific research interests. We emphasize that not all tissues or organisms may be*  
101 *optimally suited to develop this assay. Rather, we suggest that researchers develop assays using*  
102 *whichever system and/or tissue is best suited for the process they wish to target.*

- 103 • Proteins whose expression is to be controlled to confer toxicity should be selected based on potential  
104 for gain-of-function toxicity, either through constitutive activation through mutation (gain of normal  
105 function), mis-expression (gain of novel function), or removal of negative regulator through  
106 conditional knockout, including engineered temperature-sensitive mutations<sup>6</sup> or chemogenetic tools  
107 like the auxin inducible degron<sup>3-5</sup>.
  - 108 ○ Mutational activation of CED-10/Rac via the Q61L mutation described here to disrupt  
109 morphogenesis is an example of gain of normal function.
  - 110 ○ Mis-expression of the EGL-1/BH3-only protein in epithelial (hypodermal) cells to induce  
111 apoptosis is an example of gain of novel function.
- 112 • Tissues to be targeted should be guided based on prior evidence of function in those tissues.

- 113           ○ The case for the morphogenetic hypodermis as target tissue is that it is post-differentiation  
114           and post-mitotic<sup>7</sup>. CED-10/Rac, a well-known regulator of cytoskeletal dynamics, has also  
115           been validated to play an important role in a series of post-mitotic morphogenetic events in  
116           the *C. elegans* mid-embryo<sup>8</sup>.
- 117           ○ Although cells in the embryonic hypodermis do not typically undergo apoptosis<sup>9</sup>, we chose to  
118           express EGL-1/BH3-only in this tissue so we could compare directly to toxicity conferred by  
119           mutationally activated CED-10/Rac, with only the cDNA expressed differing between the two  
120           tools. Indeed, we screened through far more candidate transgenes for EGL-1/BH3-only  
121           expression than for CED-10/Rac expression, and were never able to consistently obtain 100%  
122           lethality.
- 123           ○ A more promising tissue in which to evoke apoptosis through ectopic expression of EGL-  
124           1/BH3-only would be neurons, among which a large number undergo apoptosis during the  
125           normal course of *C. elegans* development<sup>9,10</sup>.
- 126           ● Piloting toxicity: Prior to assembling the entire system, a quick pilot experiment to evaluate the  
127           original premise may increase the likelihood of success. For CED-10/Rac, we overexpressed three  
128           small GTPases known from other systems to control cytoskeletal dynamics during cell movements  
129           – Rac, Rho and Cdc42<sup>11</sup> – by generating high-copy transgenes with cosmid clones of genome  
130           intervals containing each gene. This is a relatively quick assay. Of these, CED-10/Rac conferred  
131           diverse defects in morphology with greater penetrance than did Rho/RHO-1 or Cdc42/CDC-42. This  
132           was our sole indicator that CED-10/Rac was a promising candidate.

133

134 ***Selection of conditional expression systems***

135 *Like selection of proteins of interest, selection of tissues to be targeted should be performed in consultation*  
136 *with the literature and/or an expert in the field to make decisions most likely to result in success.*

- 137 • The promoter is part of the conditional expression system in our application, driving expression only  
138 in a defined tissue. In this context, we selected a specific variant of the *lin-26* promoter, eFGHi,  
139 previously demonstrated to express mainly in hypodermal cells during embryonic morphogenesis.  
140 The complete range of *lin-26* expression includes post-embryonic epithelial cells as well as diverse  
141 support cells, and thus would likely complicate interpretation and make subsequent analysis more  
142 difficult<sup>12</sup>. Other promoter types could target other tissues, developmental stages, or environmental  
143 conditions, including heat-shock promoters<sup>13</sup>.
- 144 • Both spatial and temporal control.
  - 145 ○ In addition to the eFGHi variant of the *lin-26* promoter to confer spatial specificity, we coupled  
146 conditional degradation through the 3'UTR to confer temporal specificity via temperature  
147 sensitive mutations that abrogate NMD. Nonsense-mediated decay has a robust history in *C.*  
148 *elegans*<sup>14</sup> but has the potential downside of regulating many transcripts of the animal,  
149 including potentially those that are part of normal regulation of development of genome  
150 surveillance, rather than the aberrant premature termination codons for which NMD is best  
151 known<sup>15</sup>.
  - 152 ○ A similar informational suppressor system uses an intron from the *unc-52* gene that is  
153 selectively spliced by MEC-8, a splicing factor for which a temperature-sensitive allele exists.  
154 Retention of the intron abrogates gene function, and splicing of the intron relies on *mec-*  
155 *8(u218ts)*<sup>16</sup>.
  - 156 ○ We point to recent advances with the auxin-inducible degron (AID), a conditional degradation  
157 system that requires a substrate protein to be tagged with the AID sequence, requires the

158 TIR1 co-factor that can be expressed in different tissues or different times, and requires  
159 addition of the auxin small molecule to trigger degradation<sup>3</sup>; Ashley *et al.*, in press; preprint  
160 available at <https://doi.org/10.1101/2020.05.12.090217> .

### 161 162 **Generation of transgenes expressing toxic proteins**

163 To engineer toxicity, one must be able to generate tools under conditions that permit viability. As noted in  
164 this study, the *smg-1(ts)* system is leaky: at 15°C, protein is expressed and causes some level of toxicity.  
165 This feature of the system made it difficult to generate conditionally toxic transgenes in the *smg-1(ts)*  
166 animals at 15°C: we systematically biased against the weakly expressing transgenes that could be tolerated  
167 by the animal. We therefore developed a protocol to reproducibly isolate toxic transgenes, starting with the  
168 wild-type animal in which expression was less leaky.

- 169 • Inject the DNA mix, including selection markers ( $P_{myo-2}::gfp$  and/or *rol-6(d)*) into a wild-type  
170 background, and isolate scores of independently derived extrachromosomal arrays.
- 171 • Plate each candidate line on bacteria expressing dsRNA targeting a gene required for NMD (we  
172 used *smg-1*, clone C48B6.6, address I-3K02).
- 173 • Select transgenes causing a range of severity of defects when grown on bacteria expressing *smg-*  
174 *1*-directed dsRNA<sup>17</sup>. Score several lines semi-quantitatively (for speed) and forward for further  
175 analysis. (We do not freeze the scores of lines, typically settling for ~5 for freezing and further  
176 analysis).
- 177 • We then integrate extrachromosomal arrays in the wild-type animal background using a variety of  
178 published protocols: UV, gamma irradiation, etc.<sup>18</sup>.

- 179
- Re-test with *smg-1(RNAi)*. Some integrated lines are approximately the same strength, while others are markedly weaker, often accompanied by decreased expression of the  $P_{myo-2}::gfp$  pharyngeal GFP co-expression marker. We discard the latter.
- 180
- 181
- Outcross resulting integrants 4x into the wild-type strain background. Freeze the resulting outcrossed strain.
- 182
- 183
- For candidates of different levels of severity on *smg-1(RNAi)*, cross into the *smg-1(cc546ts)* strain, using either SNP-snip PCR detection of the *cc546* lesion (Supplementary Figure 6) or balancing the *smg-1* locus with a mutation in the closely linked *unc-87*. (*N.B.* most strains will display some lethality at permissive temperature of 15°C).
- 184
- 185
- 186
- 187
- Be extremely careful about genetic drift; we observed that strains conferring toxicity became less severe when cultured over many generations.
- 188
- 189
- To prevent drift, we perform the following steps.
- 190
- Immediately starve and freeze candidate strains. We also test thaw and quantitatively assess lethality to ensure that the frozen strain has not drifted.
- 191
- 192
- Maintain the strain as a starved, parafilm plate for a few months. From this plate, we would extract animals weekly with a chunk of agar, to constantly provide “fresh,” undrifted animals for assays or further crosses.
- 193
- 194
- Severity can be reset by reconstructing the strains by crossing in *unc-87* to balance *smg-1* and then re-isolating the original strain. Thus, we hypothesize that modifying mutations accumulate over time, though we cannot rule out silencing of the transgene.
- 195
- 196
- 197
- 198
- Assess toxicity for each *smg-1(ts)*+transgene combination for those reaching 100% lethality. Select for further analysis those that are not at the upper end of the temperature range; above 25°C, animals can be difficult to culture without drift.
- 199
- 200
- 201

- Generate an efficacy curve at a range of temperatures (T-curve). Proceed only with those that confer 100% lethality at or below 25° but are fecund at 15°C
- Validate source of toxicity by RNAi-dependent depletion of the toxic protein, small molecule inhibition, genetic perturbation of “downstream” intermediaries, etc. (see **Fig. 2**).

This protocol should yield strains with properties similar to those described here. However, we note that successfully attaining the desired goal of 100% lethality is a function of multiple variables. Selection of transgenes that confer the strongest defects biases the results towards success, but some systems may not be capable of reproducibly driving 100% lethality. As an example, we use our system with EGL-1/BH3-only expressed conditionally in hypodermal cells. The strain we analyzed was selected from many scores of candidates, and still fell short of reproducibly reaching 100% lethality. (We could attain 100% lethality at 27°C, but resultant animals were sickly and sterile).

## Supplementary Figure Legends

**Supplementary Figure 1. Epithelial-specific GFP expression at 15°C. a-d)** The same early enclosure staged *smg-1(cc546ts); rels8[P<sub>lin-26</sub>::gfp::NMD<sup>S</sup>3'UTR]* embryo in different focal planes. **a,** **b)** Epifluorescence (500 msec exposure) and DIC images, respectively, of the dorsal surface of the embryo, with arrows indicating a row of intercalating epithelial cells. **c,d)** Epifluorescence (500 msec exposure) and DIC images, respectively, of a medial section of the embryo, with arrows indicating the column of intestinal cells.

**Supplementary Figure 2. NMD-dependent differences in gene expression.** Animals harboring the *cc546* temperature-sensitive mutation in *smg-1* have increased *unc-54(r293)* mRNA levels at 25°C by RT-PCR, with *pmp-3* RNA as a control. RNA extractions were performed on pools of adult animals raised at either 15°C or 25°C. cDNA preparations of each strain were subjected to 25, 30 or 35 cycles of PCR with *unc-54*-specific primers. Temperature-dependent differences were visible at 30 cycles with the *cc546ts* allele of *smg-1* used in this study but not the *smg-1(+)* or *smg-1(r861)* putative null mutation, as shown in the graph. Band intensities were quantified using the Image J gel analysis tool. Experiment was performed two times.

**Supplementary Figure 3: A *smg-1* temperature-sensitive allele regulates locomotion.** All strain backgrounds harbor NMD-sensitive *unc-54(r293)*. Photomicrographs were captured from agar plates with 25 msec exposures under same lamp settings. Body posture is representative of locomotion and hence myosin production by the *unc-54* gene and its NMD-sensitive mutation in the *unc-54* 3'UTR, *r293*: deep body bends represent typical locomotion, shallow bends represent flaccid paralysis. **a)** *unc-54(r293)* animals were paralyzed and egg-laying defective (Egl). **b)** The locomotion

240 and Egl defects of the *r293* mutant were strongly rescued by loss of *smg-1* function. **c)** Locomotion  
241 and Egl defects were not as severe with *cc546ts* as with *smg-1(+)* at 15°C and **d)** are completely  
242 suppressed at 25°C, consistent with *cc546ts* being temperature sensitive.

243  
244 **Supplementary Figure 4: TS NMD-sensitive *unc-97(su110)*.** Upon crossing into the reference  
245 strain for *unc-97(su110)*, HE110, we observed that the strain contained a background mutation  
246 partially suppressing the Unc phenotype of *unc-97(su110)*. Whole genome sequencing of this strain  
247 identified a nonsense mutation in *smg-1*, which we named *re1* (see **Supplementary Figure 6**). ).  
248 Photomicrographs were captured from agar plates with 25 msec exposures under same lamp  
249 settings. Body posture is representative of locomotion and hence PINCH production by the *unc-97*  
250 gene and its NMD-sensitive mutation in the *unc-54* 3'UTR, *r293*: deep body bends represent typical  
251 locomotion, shallow bends represent flaccid paralysis. Arrows point to a clear area posterior to the  
252 pharynx that indicates a clear patch in the intestine that indicates distension with liquid due to  
253 defective defecation. **a)** *unc-97(su110)* animals alone are paralyzed, Egl, and constipated. **b)** These  
254 phenotypes are suppressed by the *smg-1(re1)* mutation crossed back into the *unc-97(su110)*  
255 background, **c)** not suppressed by *smg-1(cc546ts)* at 15°C but **d)** suppressed by *smg-1(cc546ts)* at  
256 25°C. Mutants for *unc-97* have been reported to have mechanosensory defects (Chen and Chalfie,  
257 2014), and are thereby sluggish and do not move on plate assays. Consequently, we did not include  
258 *unc-97(su110)* in our locomotion analysis for **Supplementary Figure 5**.

259  
260 **Supplementary Figure 5. RT-PCR detection of NMD-dependent differences.** Putative null  
261 mutations in *smg-1* suppress locomotion defects conferred by the aberrant *unc-54(re293)* 3'UTR at  
262 both 15°C and 25°C. *smg-1(cc545ts)* and *smg-1(cc546ts)* fail to rescue locomotion defects at 15°C



263 but rescue at 25°C. All animals were scored in sequential assays on the same day, 20-minute assays,  
264 then transferred to -20°C for 5 minutes to arrest locomotion, then counted.

265  
266 **Supplementary Figure 6: Identification of lesions in *smg-1*.** The exon-intron boundaries of the  
267 *smg-1* gene are shown. Domains are SMG1 (red), PI3Kc (blue) and FATC (gray), UTRs are white.  
268 Scale bar = 1000 bp. *cc545ts* is an ACA>ATA transition in exon 15 that causes a T761I missense  
269 change. *cc546ts* is an unusual ATG>TTG transversion in exon 35 that causes a M1957L missense  
270 change. *re1* is an unusual GAG>TAG transversion in exon 36 that causes an E2093\* nonsense  
271 change. *cc546ts* is detectable by SNP-snip: restriction enzyme Msl I cuts the wild-type but not the  
272 mutant sequence.

273  
274 **Supplementary Figure 7. Weak morphogenetic phenotypes.** Low penetrance and low  
275 expressivity phenotypes are caused by the GFP over-expressing strain *smg-1(cc546ts); rels8[Plin-*  
276 *26::gfp::NMD<sup>S</sup>3'UTR]*, perhaps due to over-represented promoter sequences titrating factors  
277 important for morphogenesis. Arrows indicate mild bulges in the animal's epithelium, frequently  
278 around the head in animals grown at 23°C. Occasional animals with such bulges grew slower,  
279 presumably due to compromised feeding. In this experiment GFP lethality = 0.8% (4/453), WT  
280 lethality = 0.6% (4/671).

281  
282 **Supplementary Figure 8. EHT 1864 rescue vs. negative control EHT 8560.** 6-well plate assays  
283 for small molecule rescue of lethality conferred by *smg-1(cc546ts); rels6* lethality at 23°C. **Top row:**  
284 Synchronized groups of animals treated with increasing doses of negative control molecule EHT  
285 8560. None survive to hatch. (Tracks are left by Rol parents that laid the eggs). **Bottom row:**

286 Synchronized groups of animals treated with increasing doses of Rac inhibitor EHT 1864. Arrows  
287 indicate a subset of grown adults, but many smaller larvae are evident. In all images, dark spots are  
288 salt crystals in the agar.

289

## 290 Supplementary Bibliography

- 291 1 Brenner, S. The genetics of *Caenorhabditis elegans*. *Genetics* **77**, 71-94 (1974).
- 292 2 Reiner, D. J. *et al.* Behavioral genetics of *caenorhabditis elegans* unc-103-encoded erg-like K(+) channel. *J Neurogenet* **20**, 41-66, doi:10.1080/01677060600788826 (2006).
- 293 3 Zhang, L., Ward, J. D., Cheng, Z. & Dernburg, A. F. The auxin-inducible degradation (AID) system enables versatile conditional protein depletion in *C. elegans*. *Development* **142**, 4374-4384, doi:10.1242/dev.129635 (2015).
- 294 4 Duong, T., Rasmussen, N. R., Ballato, E., Mote, F. S. & Reiner, D. J. The Rheb-TORC1 signaling axis functions as a developmental checkpoint. *Development* **147**, doi:10.1242/dev.181727 (2020).
- 295 5 Cho, U. *et al.* Rapid and tunable control of protein stability in *Caenorhabditis elegans* using a small molecule. *PLoS One* **8**, e72393, doi:10.1371/journal.pone.0072393 (2013).
- 296 6 Tan, G., Chen, M., Foote, C. & Tan, C. Temperature-sensitive mutations made easy: generating conditional mutations by using temperature-sensitive inteins that function within different temperature ranges. *Genetics* **183**, 13-22, doi:10.1534/genetics.109.104794 (2009).
- 297 7 Chisholm, A. D. & Hardin, J. Epidermal morphogenesis. *WormBook*, 1-22, doi:10.1895/wormbook.1.35.1 (2005).
- 298 8 Walck-Shannon, E., Reiner, D. & Hardin, J. Polarized Rac-dependent protrusions drive epithelial intercalation in the embryonic epidermis of *C. elegans*. *Development* **142**, 3549-3560, doi:10.1242/dev.127597 (2015).
- 299 9 Sulston, J. E., Schierenberg, E., White, J. G. & Thomson, J. N. The embryonic cell lineage of the nematode *Caenorhabditis elegans*. *Dev Biol* **100**, 64-119, doi:10.1016/0012-1606(83)90201-4 (1983).
- 300 10 Sulston, J. E. & Horvitz, H. R. Post-embryonic cell lineages of the nematode, *Caenorhabditis elegans*. *Dev Biol* **56**, 110-156, doi:10.1016/0012-1606(77)90158-0 (1977).
- 301 11 Hall, A. Rho GTPases and the actin cytoskeleton. *Science* **279**, 509-514, doi:10.1126/science.279.5350.509 (1998).
- 302 12 Landmann, F., Quintin, S. & Labouesse, M. Multiple regulatory elements with spatially and temporally distinct activities control the expression of the epithelial differentiation gene *lin-26* in *C. elegans*. *Dev Biol* **265**, 478-490 (2004).
- 303 13 Stringham, E. G., Dixon, D. K., Jones, D. & Candido, E. P. Temporal and spatial expression patterns of the small heat shock (*hsp16*) genes in transgenic *Caenorhabditis elegans*. *Mol Biol Cell* **3**, 221-233, doi:10.1091/mbc.3.2.221 (1992).
- 304 14 Stalder, L. & Muhlemann, O. The meaning of nonsense. *Trends Cell Biol* **18**, 315-321, doi:10.1016/j.tcb.2008.04.005 (2008).
- 305 15 Muir, V. S., Gasch, A. P. & Anderson, P. The Substrates of Nonsense-Mediated mRNA Decay in *Caenorhabditis elegans*. *G3 (Bethesda)* **8**, 195-205, doi:10.1534/g3.117.300254 (2018).
- 306 16 Calixto, A., Ma, C. & Chalfie, M. Conditional gene expression and RNAi using MEC-8-dependent splicing in *C. elegans*. *Nat Methods* **7**, 407-411, doi:10.1038/nmeth.1445 (2010).
- 307 17 Timmons, L., Court, D. L. & Fire, A. Ingestion of bacterially expressed dsRNAs can produce specific and potent genetic interference in *Caenorhabditis elegans*. *Gene* **263**, 103-112, doi:10.1016/s0378-1119(00)00579-5 (2001).
- 308 18 Praitis, V. & Maduro, M. F. Transgenesis in *C. elegans*. *Methods Cell Biol* **106**, 161-185, doi:10.1016/B978-0-12-544172-8.00006-2 (2011).
- 309
- 310
- 311
- 312
- 313
- 314
- 315
- 316
- 317
- 318
- 319
- 320
- 321
- 322
- 323
- 324
- 325
- 326
- 327
- 328
- 329
- 330
- 331
- 332
